# Supplementary material
Source: PubMed Central journal article supplement (PMC6985909)
Supplement: NIHMS1056863-supplement-1.pdf [file NIHMS1056863-supplement-1.pdf]

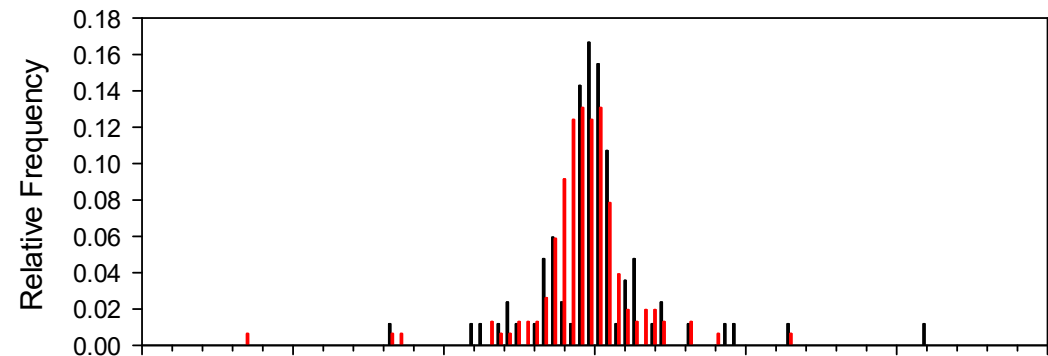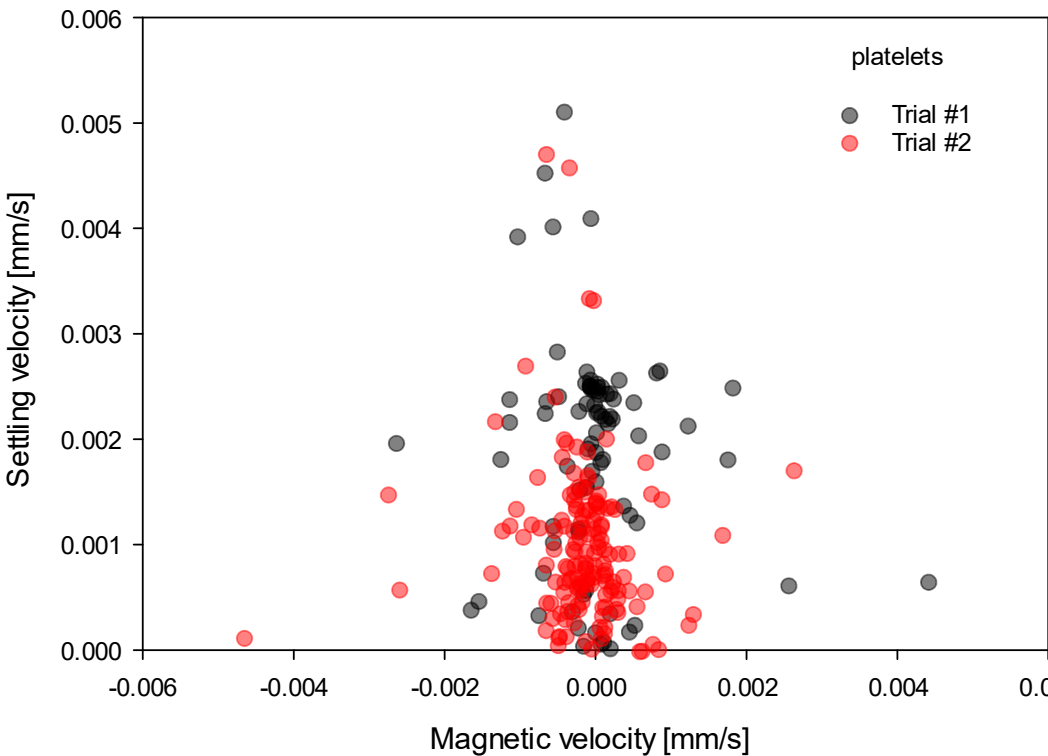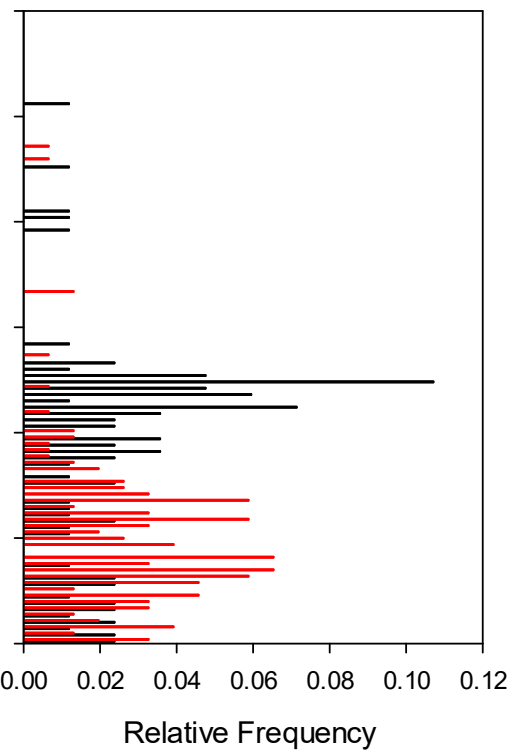

Scatter plot of Magnetic velocity vs. Settling velocity of platelets isolated by RegenKit BCT centrifuge tubes from one of the donors. Their magnetic velocities are clustered around 0

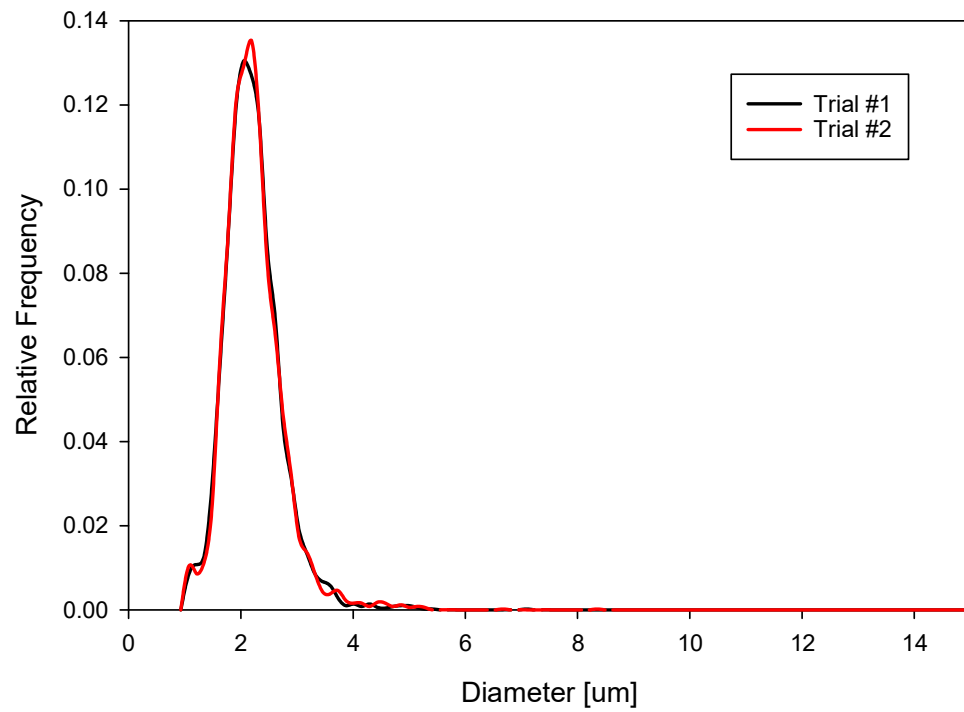

Size distribution [um] of the RegenKit BCT centrifuge tubes separated platelets.

Donor 1

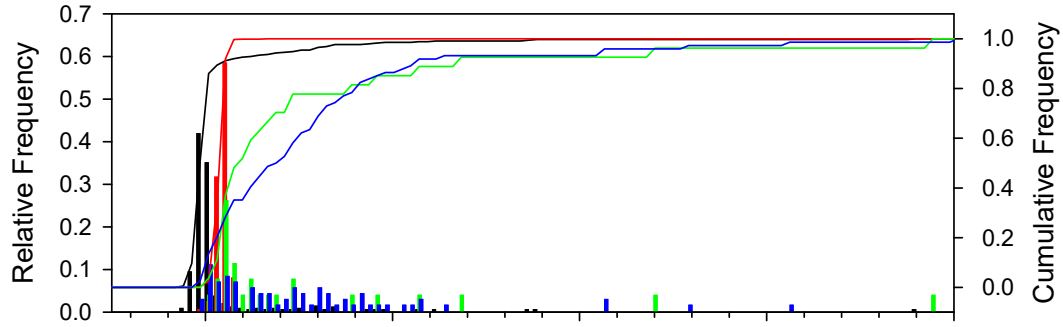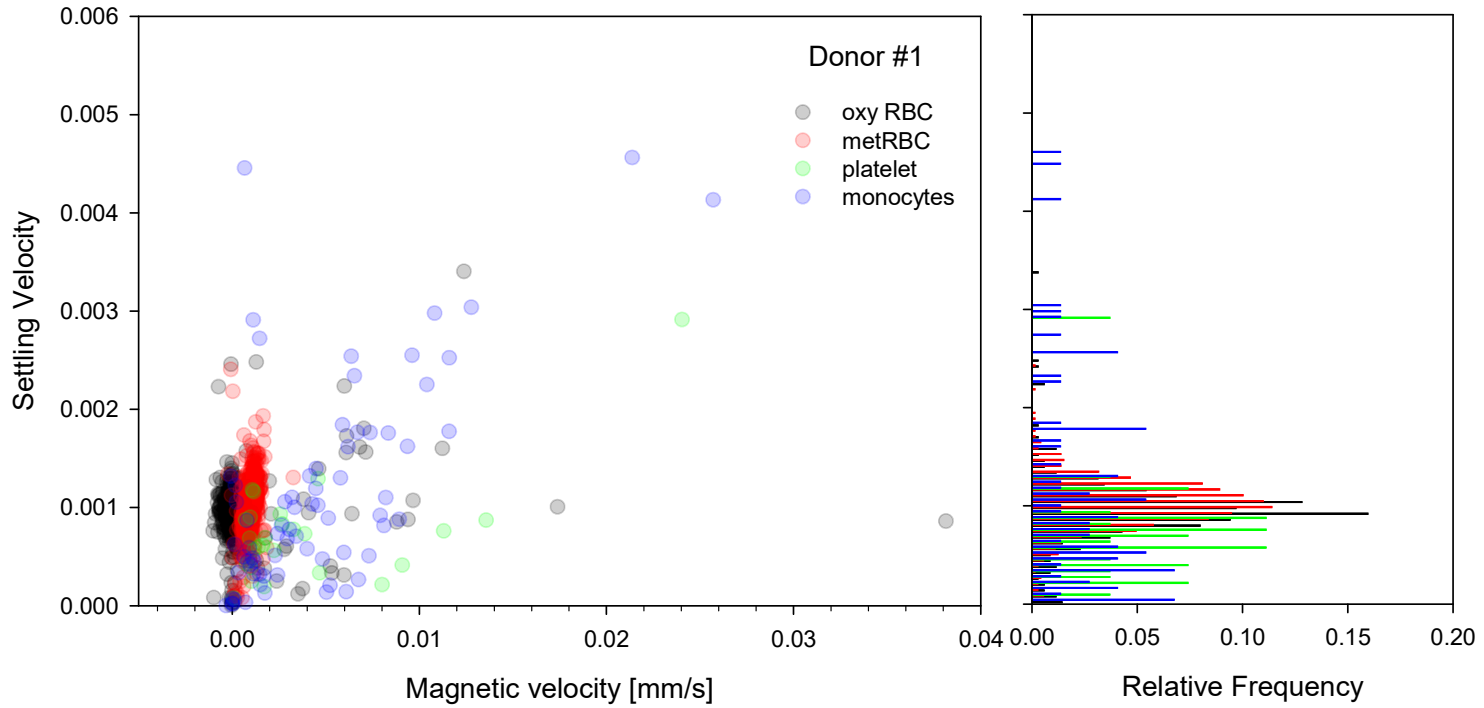

Donor 1

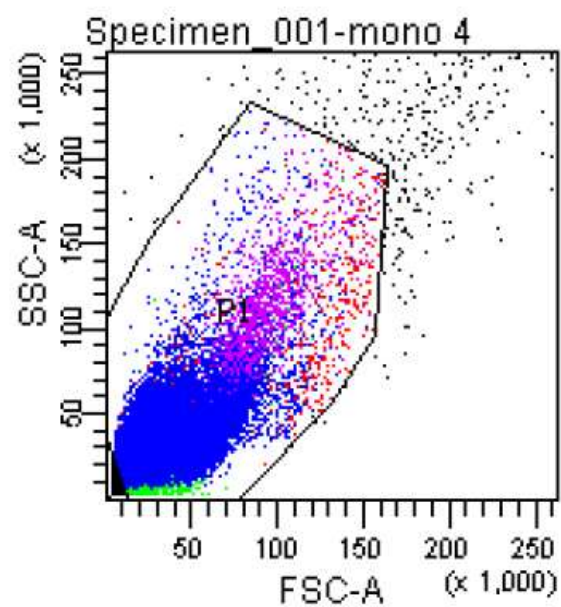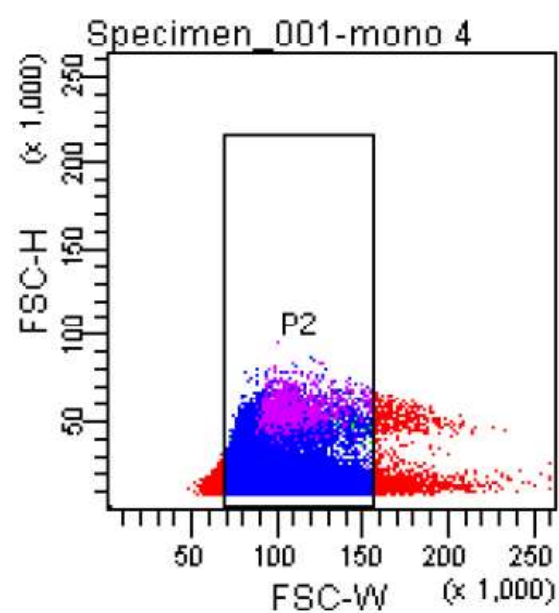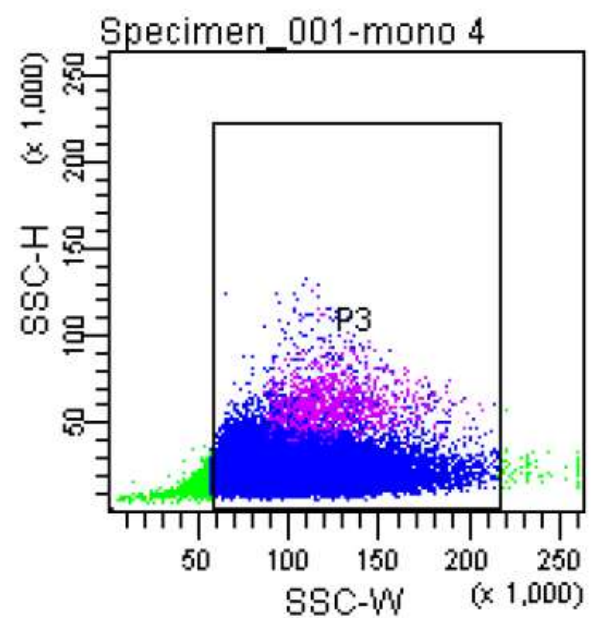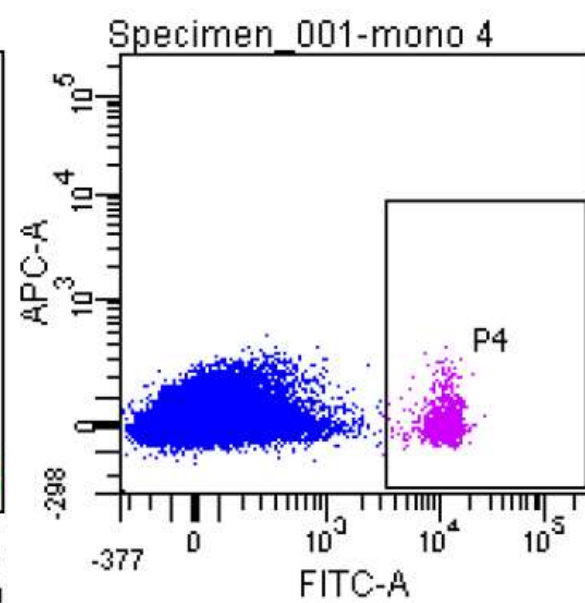

Donor 1

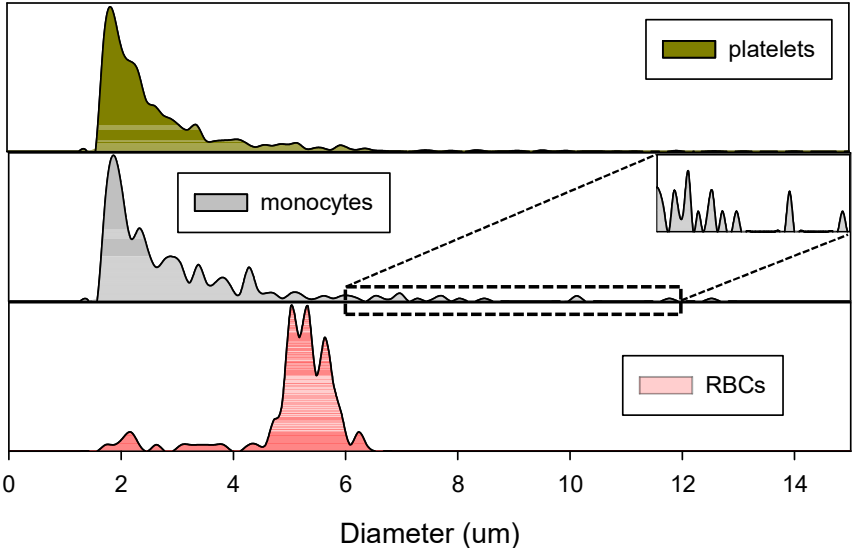

# Donor 3

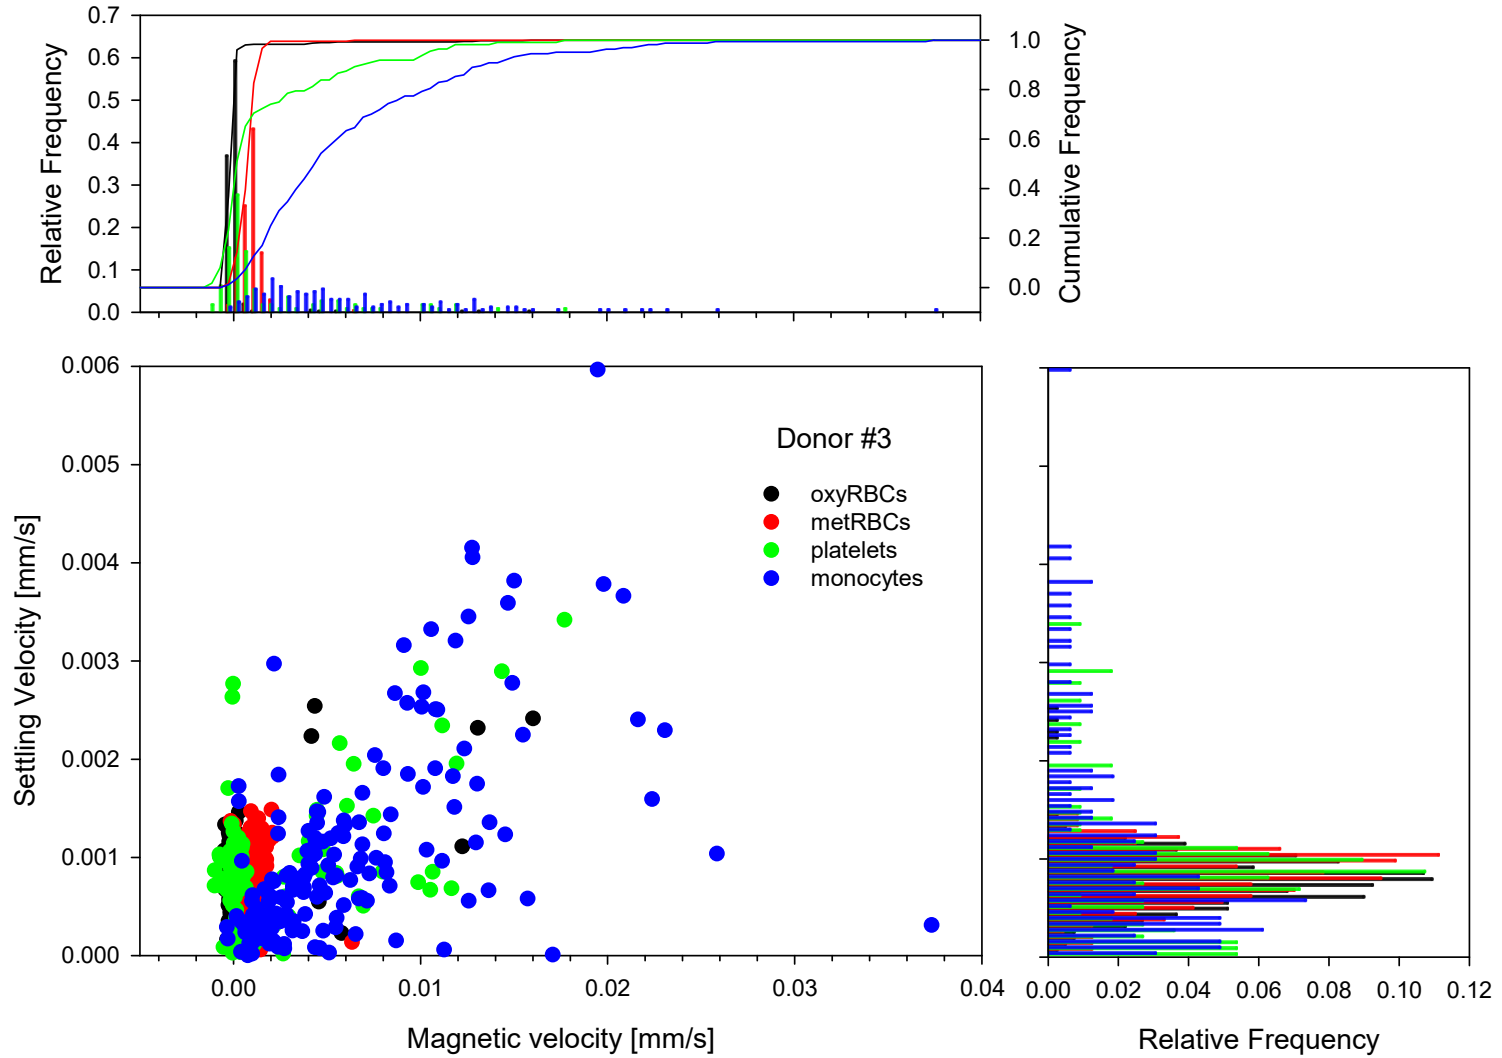

Donor 3

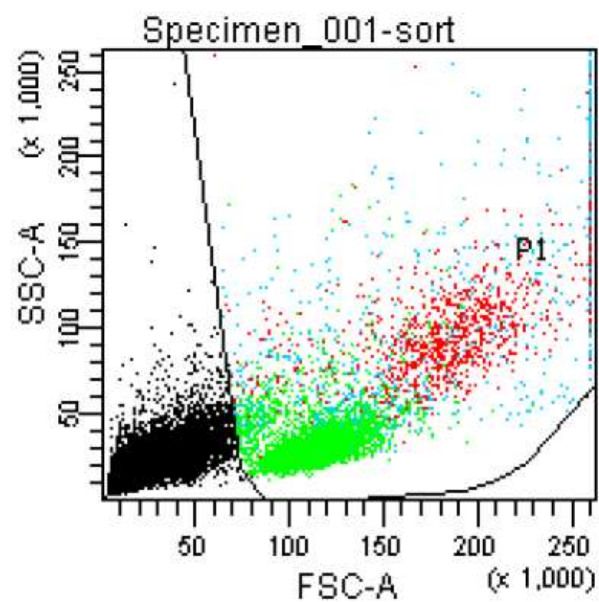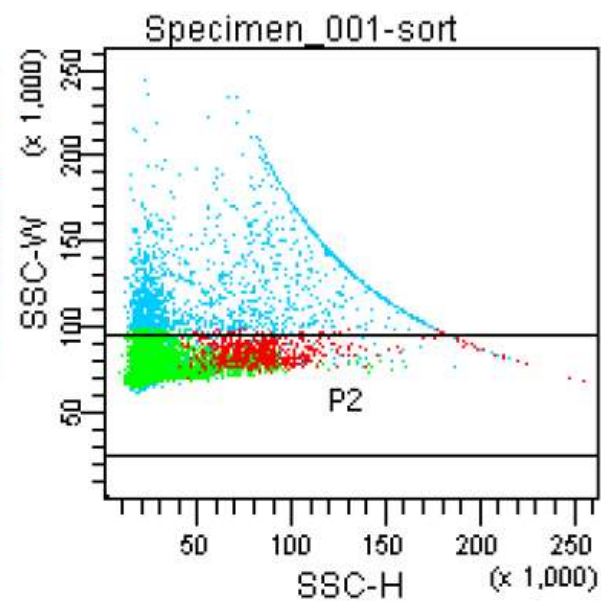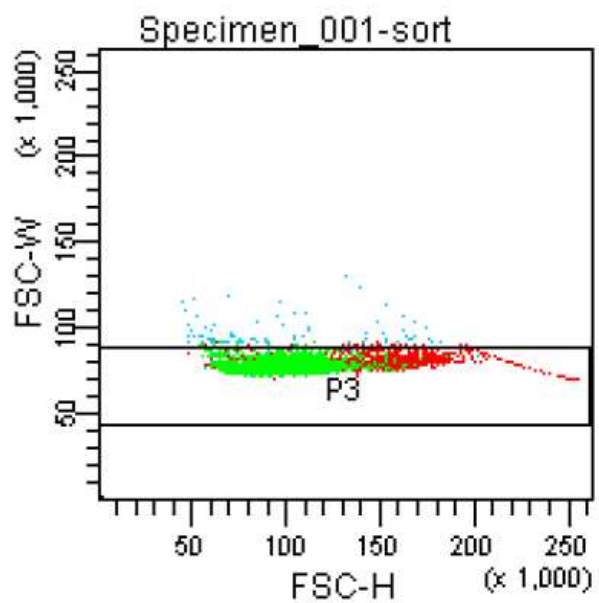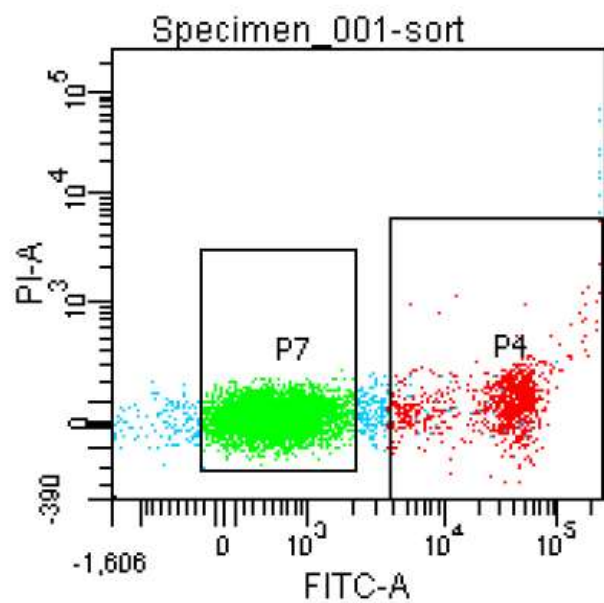

Donor 3

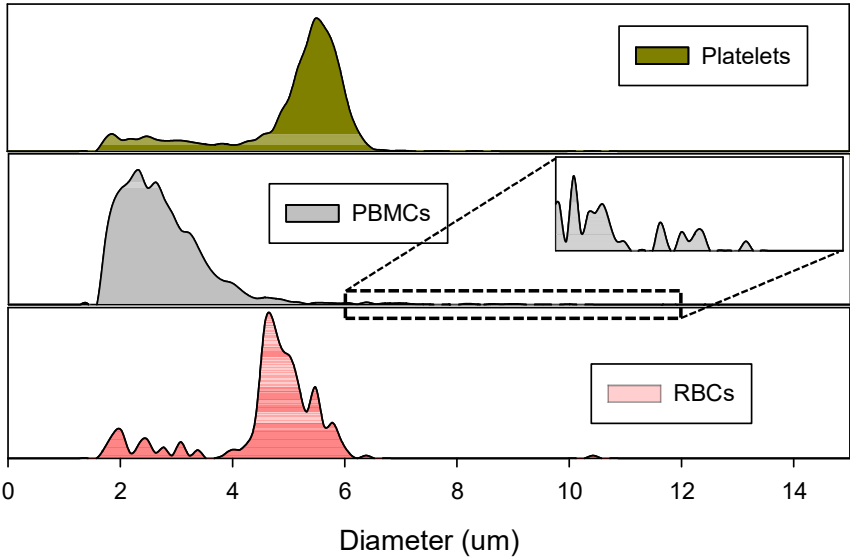



# Donor 4

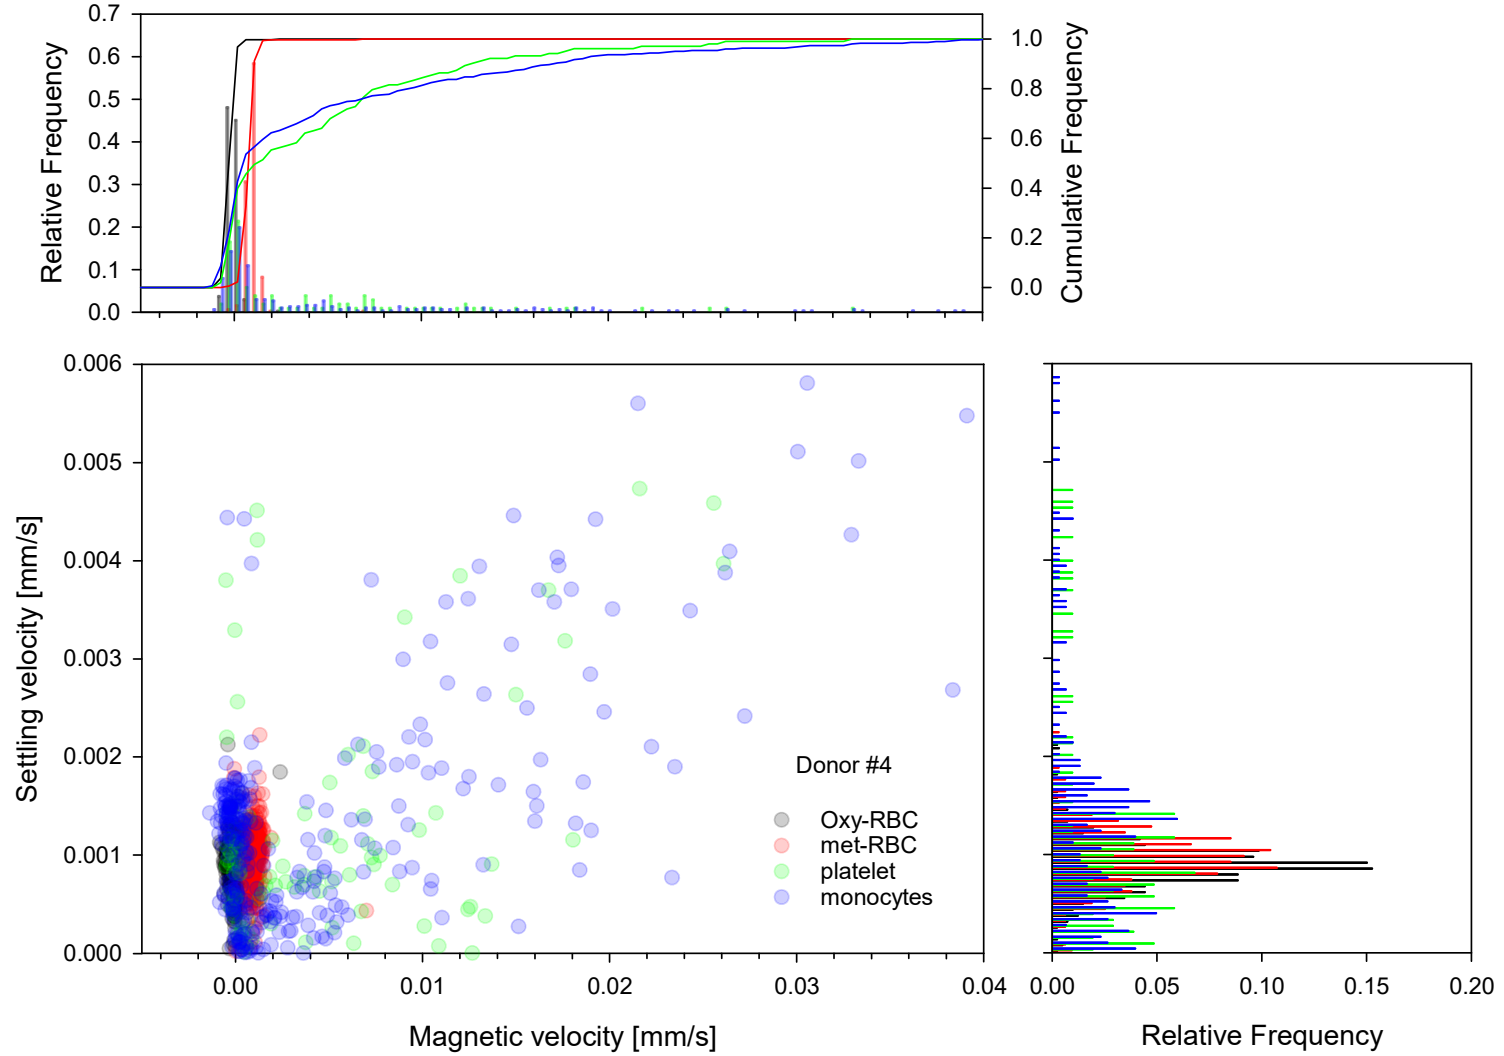

Donor 4

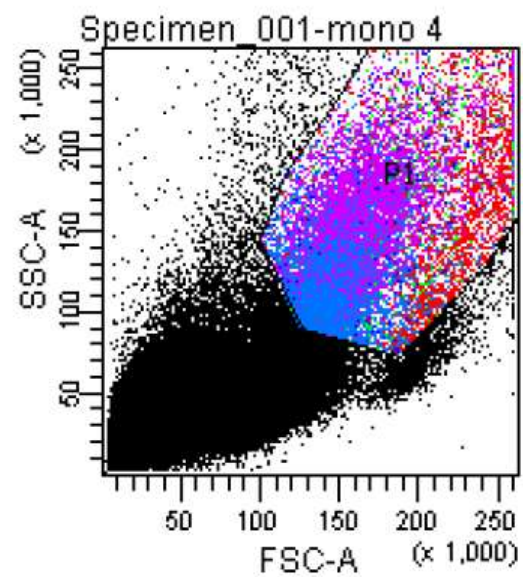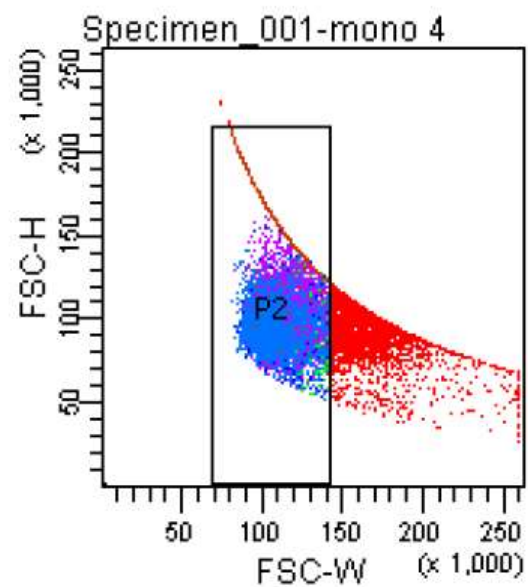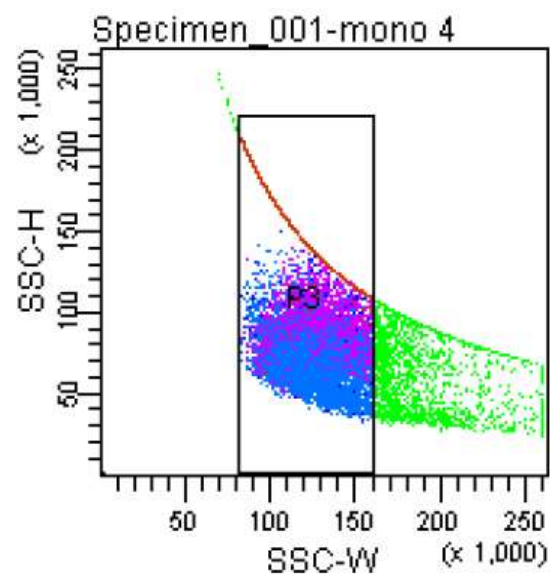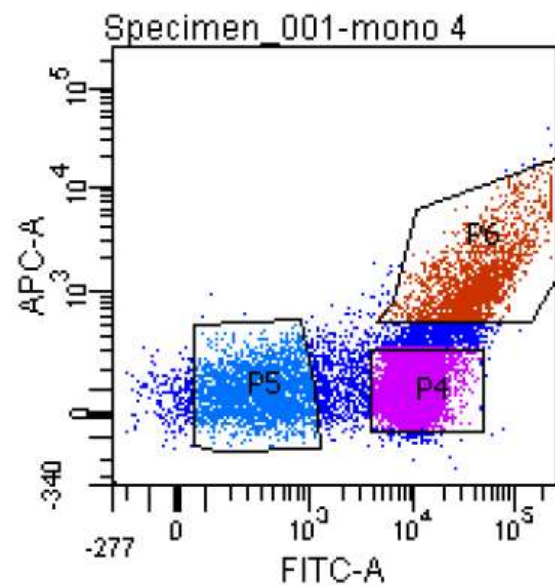

Donor 4

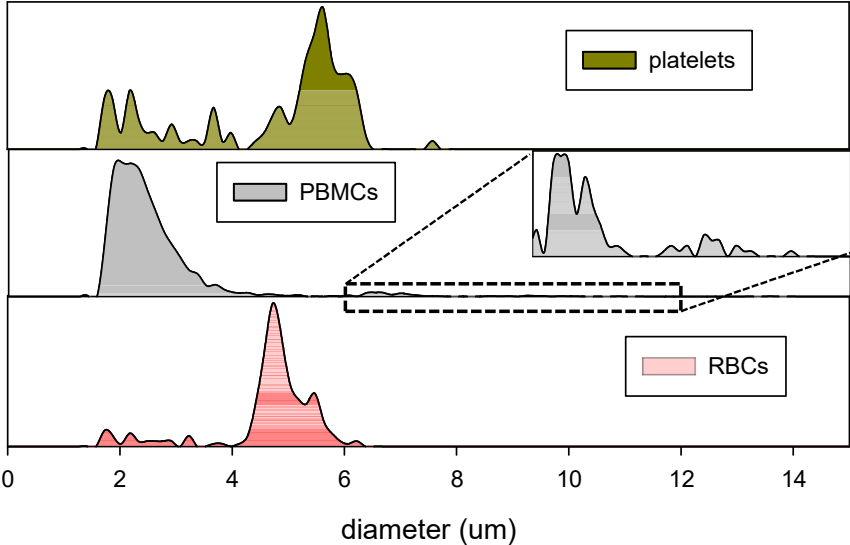

# Donor 5

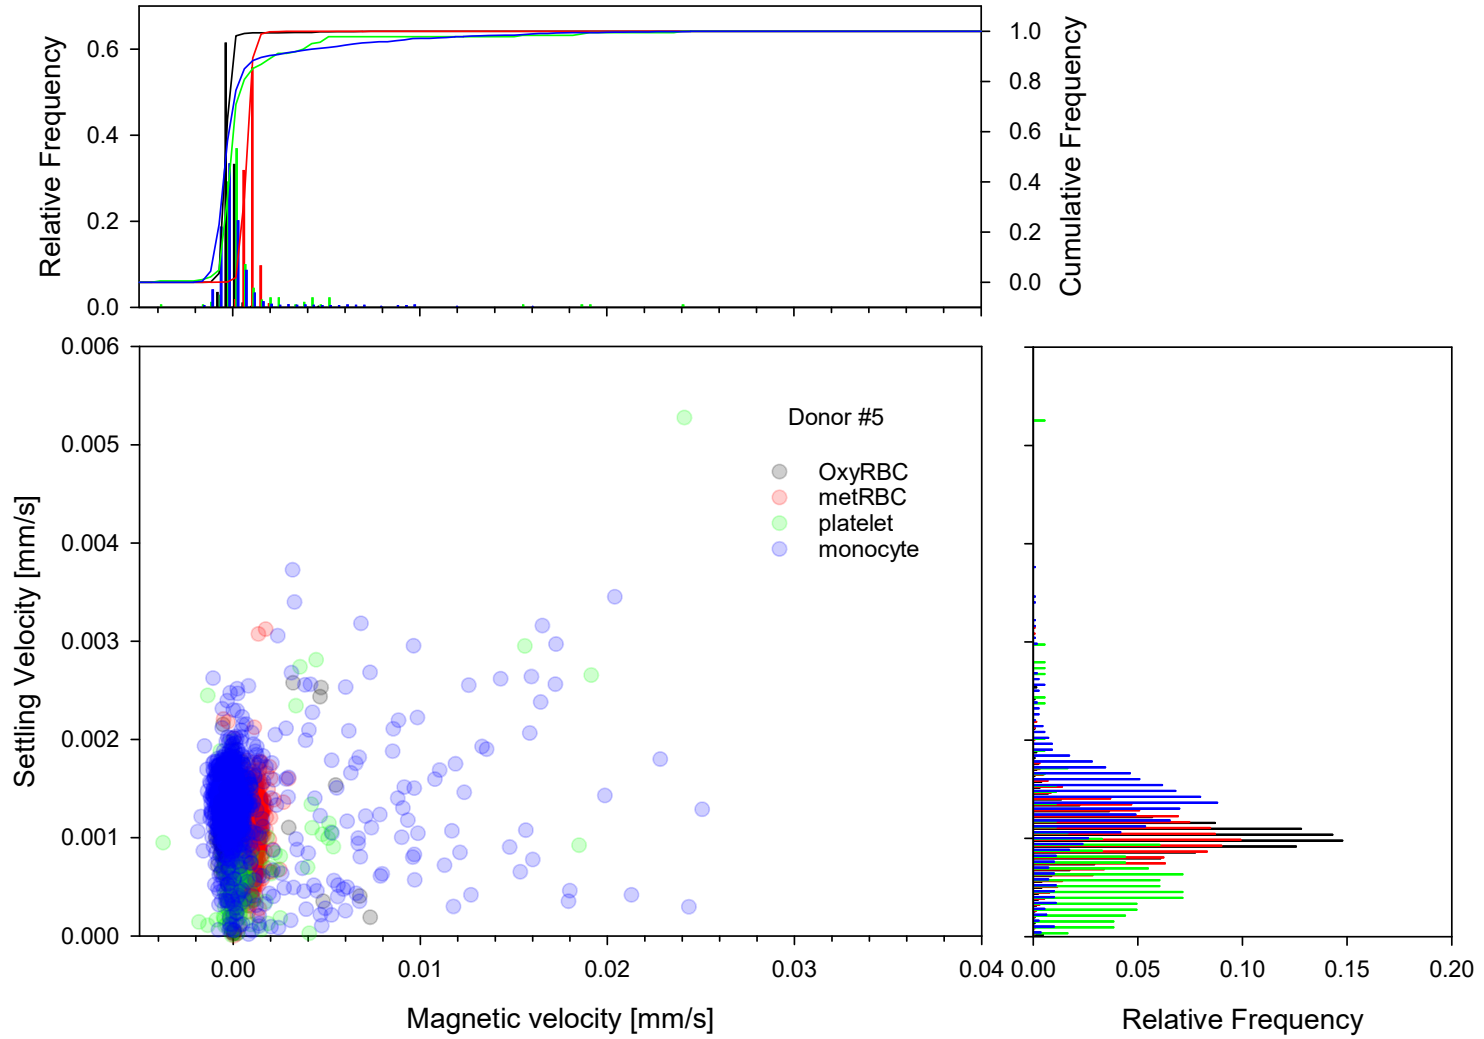

Donor 5

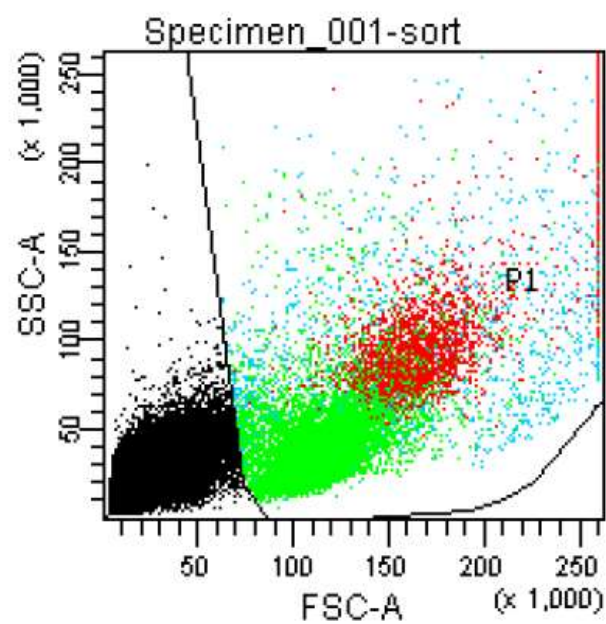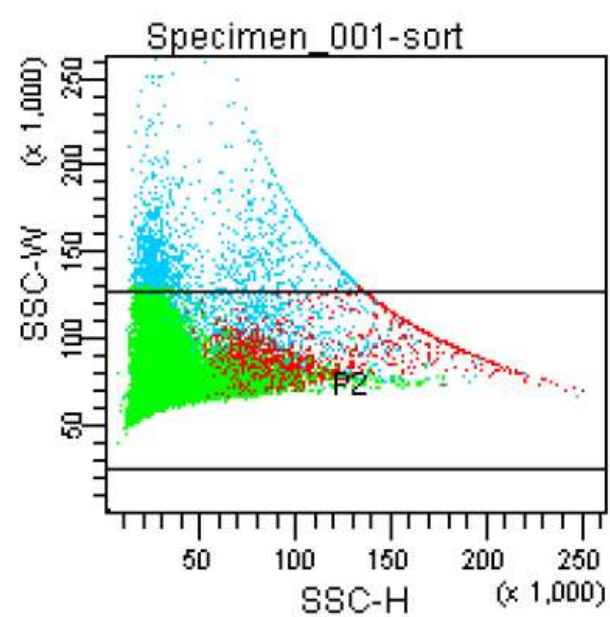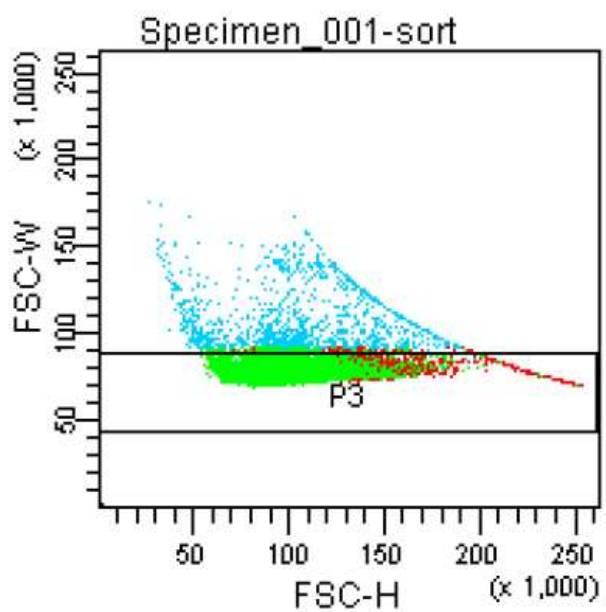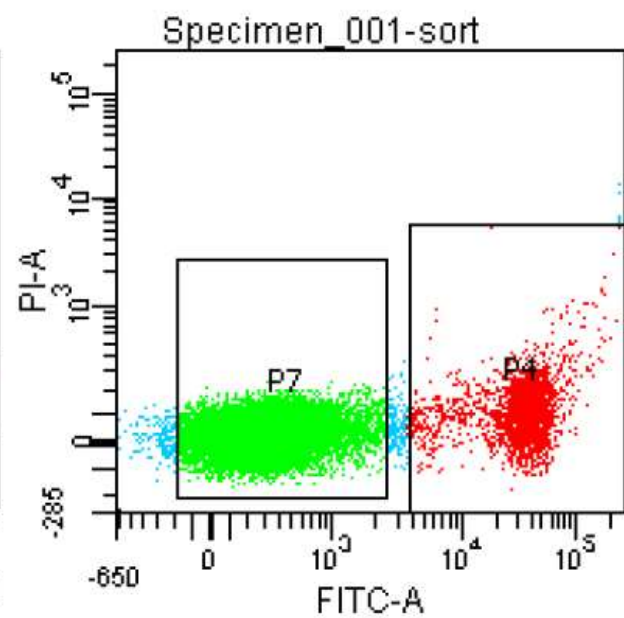

Donor 5

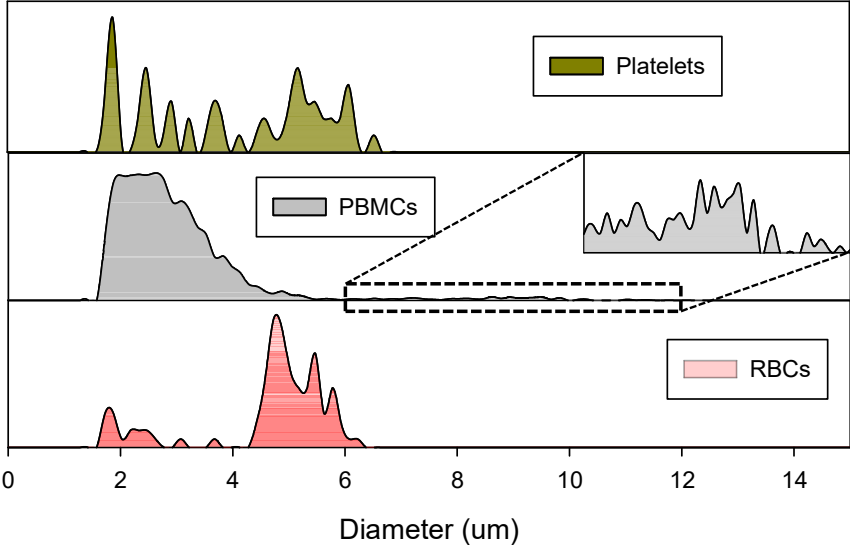

**Cytometry Part A**  
**Author Checklist: MIFlowCyt-Compliant Items**

| <b>Requirement</b>                                     | <b>Please Include Requested Information</b>                                                                                                                                                                                                                                                                                                                                         |
|--------------------------------------------------------|-------------------------------------------------------------------------------------------------------------------------------------------------------------------------------------------------------------------------------------------------------------------------------------------------------------------------------------------------------------------------------------|
| 1.1. Purpose                                           | Separate out monocytes from fresh blood                                                                                                                                                                                                                                                                                                                                             |
| 1.2. Keywords                                          | Monocyte, platelets, RBCs, magnetic susceptibility, cell tracking velocimetry, imaging cytometer                                                                                                                                                                                                                                                                                    |
| 1.3. Experiment variables                              | Donor to Donor                                                                                                                                                                                                                                                                                                                                                                      |
| 1.4. Organization name and address                     | William G. Lowrie Department of Chemical and Biomolecular Engineering, Ohio State University, 151 W. Woodruff Ave., Columbus, OH 43210                                                                                                                                                                                                                                              |
| 1.5. Primary contact name and email address            | Jeffrey Chalmers, chalmers.1@osu.edu                                                                                                                                                                                                                                                                                                                                                |
| 1.6. Date or time period of experiment                 | 12/4/2018-12/18/2018                                                                                                                                                                                                                                                                                                                                                                |
| 1.7. Conclusions                                       | We were able to successfully separate out monocytes.                                                                                                                                                                                                                                                                                                                                |
| 1.8. Quality control measures                          | BD calibration beads                                                                                                                                                                                                                                                                                                                                                                |
| 2.1.1.1. (2.1.2.1., 2.1.3.1.)<br>Sample description    | Whole Blood                                                                                                                                                                                                                                                                                                                                                                         |
| 2.1.1.2. Biological sample source description          | Healthy blood donors                                                                                                                                                                                                                                                                                                                                                                |
| 2.1.1.3. Biological sample source organism description | Human                                                                                                                                                                                                                                                                                                                                                                               |
| 2.1.2.2. Environmental sample location                 | N/A                                                                                                                                                                                                                                                                                                                                                                                 |
| 2.3. Sample treatment description                      | N/A                                                                                                                                                                                                                                                                                                                                                                                 |
| 2.4. Fluorescence reagent(s) description               | Alexa Fluor® 488 Mouse Anti-Human CD14                                                                                                                                                                                                                                                                                                                                              |
| 3.1. Instrument manufacturer                           | BD Bioscience                                                                                                                                                                                                                                                                                                                                                                       |
| 3.2. Instrument model                                  | FACS ARIA II                                                                                                                                                                                                                                                                                                                                                                        |
| 3.3. Instrument configuration and settings             | Default                                                                                                                                                                                                                                                                                                                                                                             |
| 4.1. List-mode data files                              | 1) The link for peer-review process:<br><a href="http://flowrepository.org/id/RvFr8RBMbaGOQWwLk4MjauVEsHjxDfpEaJNh3pa1Rh1JyUZqEQXuA6S1stEXpgM">http://flowrepository.org/id/RvFr8RBMbaGOQWwLk4MjauVEsHjxDfpEaJNh3pa1Rh1JyUZqEQXuA6S1stEXpgM</a><br>2) The repository identifier:<br><a href="http://flowrepository.org/id/FR-FCM-ZYVZ">http://flowrepository.org/id/FR-FCM-ZYVZ</a> |
| 4.2. Compensation description                          | N/A                                                                                                                                                                                                                                                                                                                                                                                 |
| 4.3. Data transformation details                       | N/A                                                                                                                                                                                                                                                                                                                                                                                 |
| 4.4.1. Gate description                                | N/A                                                                                                                                                                                                                                                                                                                                                                                 |
| 4.4.2. Gate statistics                                 | N/A                                                                                                                                                                                                                                                                                                                                                                                 |
| 4.4.3. Gate boundaries                                 | N/A                                                                                                                                                                                                                                                                                                                                                                                 |
